# Supplementary material
Source: publisher figshare collection journal article supplement (https://acs.figshare.com/ndownloader/files/27874832)
Supplement: Supplementary file 1 [file 27874832]

## Supplementary Material

# Efficient light-driven fuel cell with simultaneous degradation of pollutants on TiO<sub>2</sub> photoanode and production of H<sub>2</sub>O<sub>2</sub> on gas diffusion electrode (GDE) cathode

*Tian Wang<sup>a</sup>, Fei Ye<sup>b</sup>, Shuai Wu<sup>a</sup>, Shuo Chen<sup>a</sup>, Hongtao Yu<sup>a</sup>, Xie Quan<sup>a,\*</sup>*

<sup>a</sup>Key Laboratory of Industrial Ecology and Environmental Engineering (Ministry of Education, China), School of Environmental Science and Technology, Dalian University of Technology, Dalian 116024, China

<sup>b</sup>School of Environmental and Chemical Engineering, Yanshan University, Qinhuangdao 066004, China

\*Corresponding author.

Email address: [quanxie@dlut.edu.cn](mailto:quanxie@dlut.edu.cn)

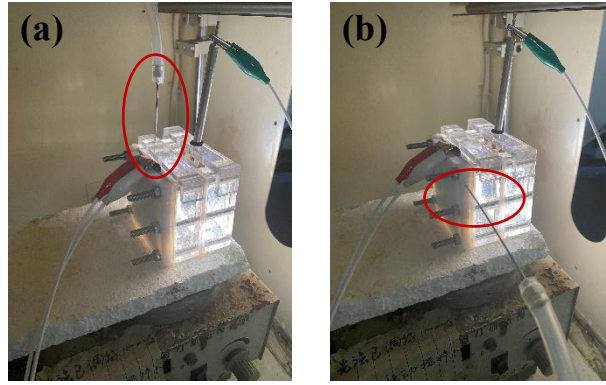

**Figure S1.** The real images of (a) normal aeration mode and (b) gas diffusion aeration mode.

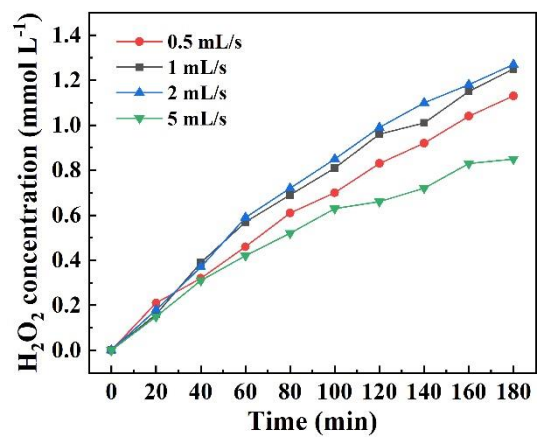

**Figure S2.** The effect of O<sub>2</sub> flow rate on H<sub>2</sub>O<sub>2</sub> generation.

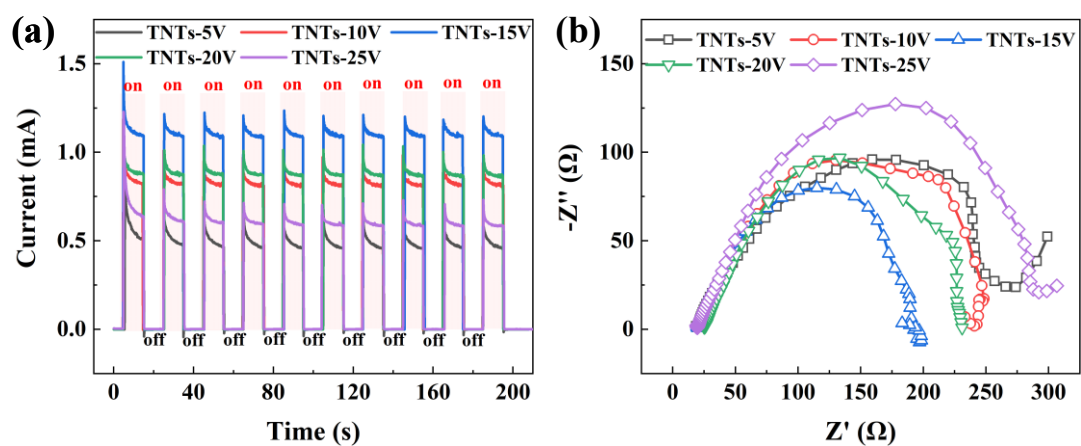

**Figure S3.** (a) Photocurrent-time curves and (b) Nyquist plots of TNTs-x V (x= 5, 10, 15, 20 and 25). Experiment conditions: 0.05 M Na<sub>2</sub>SO<sub>4</sub>, 0 V bias potential, simulated solar light ( $\lambda$ : 320-780 nm) illumination.

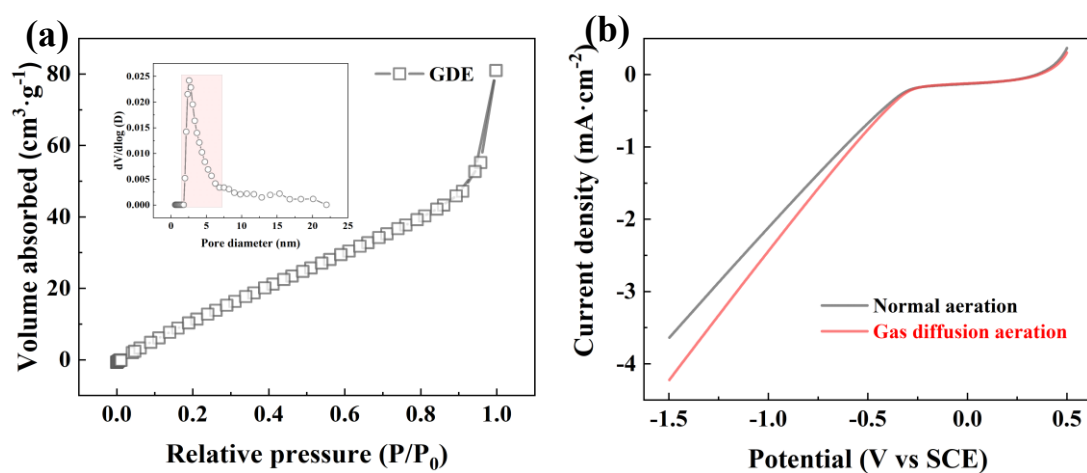

**Figure S4.** (a)  $N_2$  adsorption-desorption isotherms and pore distribution (inset) of GDE and (b) LSV of GDE (black line: normal aeration, red line: gas diffusion).

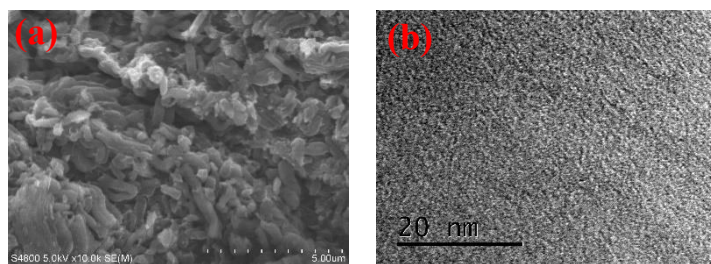

**Figure S5.** (a) SEM and (b) TEM images of the CMK-3.

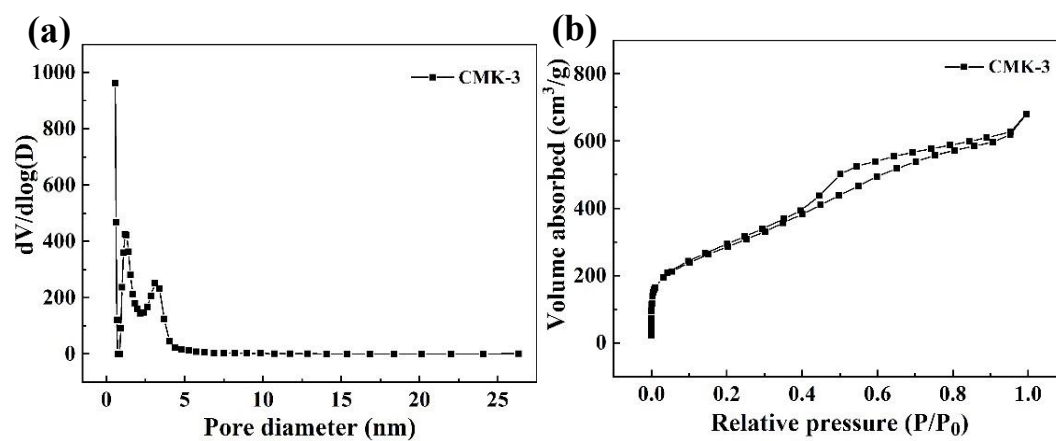

**Figure S6.** (a)  $N_2$  adsorption-desorption isotherms and (b) pore distribution of the CMK-3.

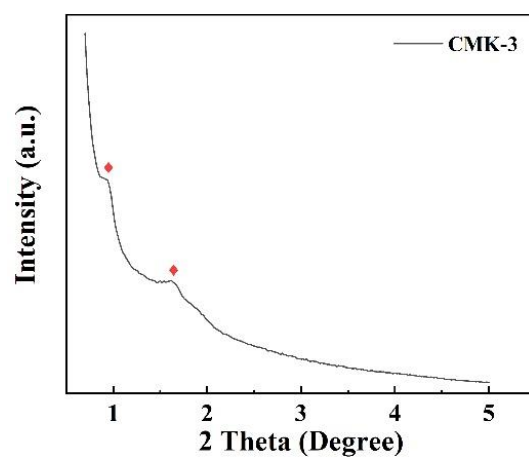

**Figure S7.** XRD pattern of the CMK-3.



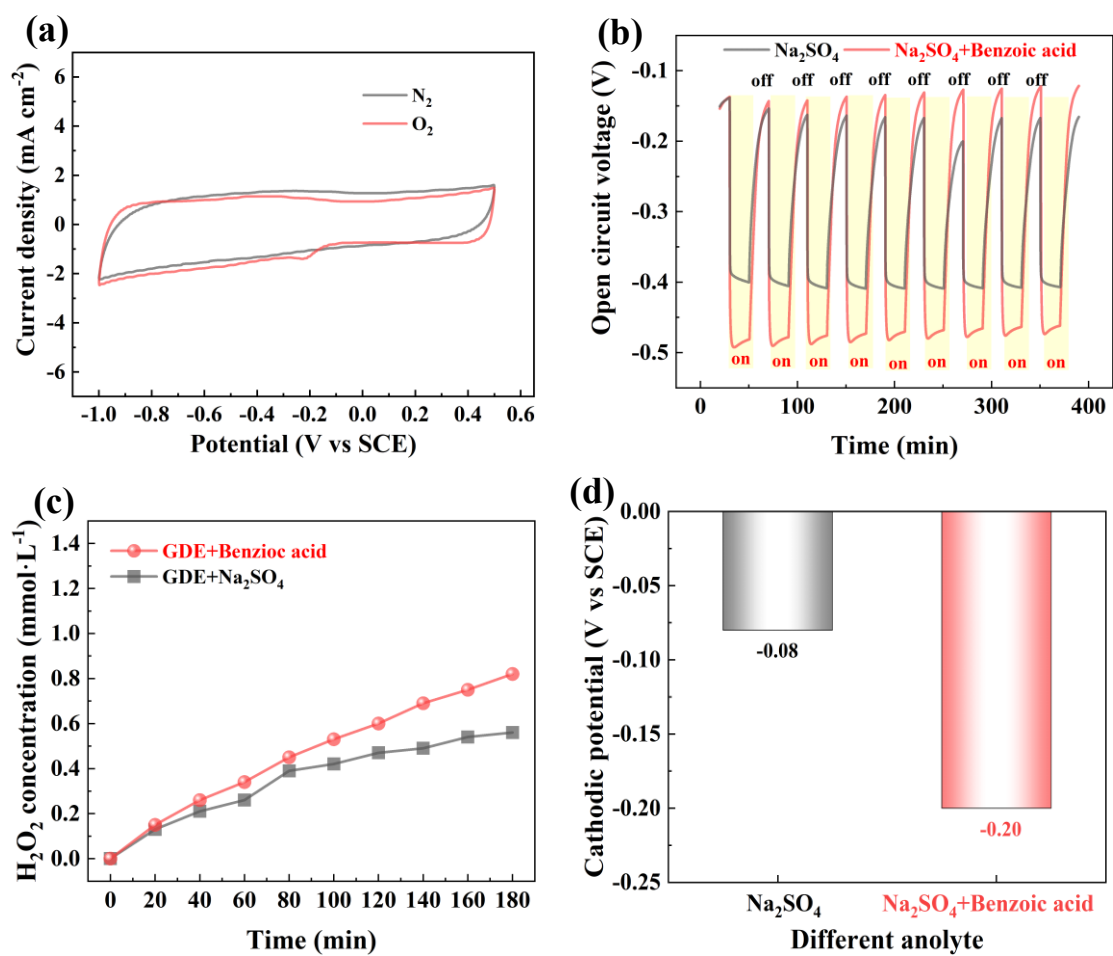

**Figure S8.** (a) CV plots of CMK-3 (black line: N<sub>2</sub> saturated, red line: N<sub>2</sub> saturated) and the influence of benzoic acid on (b) Open circuit voltage, (c) H<sub>2</sub>O<sub>2</sub> production and (d) Cathodic potential of GDE-TiO<sub>2</sub> system.

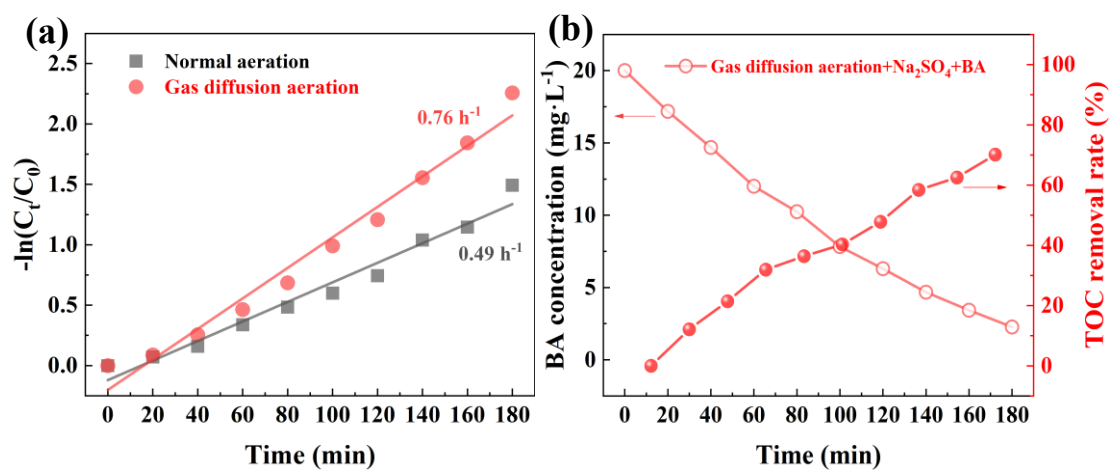

**Figure S9.** (a) The degradation kinetics of Phenol under different aeration mode (red line: gas diffusion aeration, black line: normal), (b) The degradation and mineralization plots of Benzoic Acid in the GDE- $\text{TiO}_2$  system.

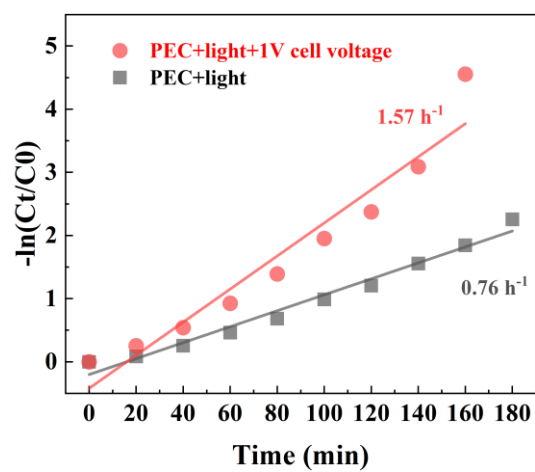

**Figure S10.** The degradation kinetics of Phenol in the GDE-TiO<sub>2</sub> system under different cell voltages (red line: PEC + light + 1 V cell voltage, black line: PEC + light).

**Table S1.** Summary of performance comparison of similar PEC systems.

|                                 | PEC system                                                               | External voltage                                         | Yield of H <sub>2</sub> O <sub>2</sub> normalized by cathode areas                       |                                                                  | Faraday efficiency of H <sub>2</sub> O <sub>2</sub> | Reference |
|---------------------------------|--------------------------------------------------------------------------|----------------------------------------------------------|------------------------------------------------------------------------------------------|------------------------------------------------------------------|-----------------------------------------------------|-----------|
| System without external voltage | Anode: WO <sub>3</sub><br>Cathode: FPC                                   | Three-electrode system<br>0V anodic bias potential       | 10 $\mu\text{mol/L/h/cm}^2$                                                              | 0.2 $\mu\text{mol/h/cm}^2$                                       | 66%                                                 | S1        |
|                                 | Anode: P-Mo-BiVO <sub>4</sub><br>Cathode: AQ-CNT/C                       | Three-electrode system<br>0V anodic bias potential       |                                                                                          | 9.6 $\mu\text{mol/h/cm}^2$<br>(A net yield of anode and cathode) | Photoanodic: 40%-50%<br>Cathodic: ~100%             | S2        |
|                                 | Anode: WO <sub>3</sub> /BiVO <sub>4</sub><br>Cathode: Pt                 | Three-electrode system<br>0 V anodic bias potential      | ~37.9 $\mu\text{mol/L/h/cm}^2$<br>(High concentration KHCO <sub>3</sub> solution of 2 M) | 1.33 $\mu\text{mol/h/cm}^2$                                      | ~54%                                                | S3        |
|                                 | <b>Our work (light only)</b>                                             | Two-electrode system<br>0V cell voltage                  | 34.7 $\mu\text{mol/L/h/cm}^2$                                                            | 1.39 $\mu\text{mol/h/cm}^2$                                      | 70.9%                                               |           |
| System with external voltage    | Anode: WO <sub>3</sub><br>Cathode: FPC                                   | Three-electrode system<br>1V anodic bias potential       | 187.5 $\mu\text{mol/L/h/cm}^2$                                                           | 3.75 $\mu\text{mol/h/cm}^2$                                      | 75%                                                 | S1        |
|                                 | Anode: P-Mo-BiVO <sub>4</sub><br>Cathode: AQ-CNT/C                       | Three-electrode system<br>1V anodic bias potential       |                                                                                          | 39.6 $\mu\text{mol/h/cm}^2$                                      | Photoanodic: ~43%<br>Cathodic: ~100%                | S2        |
|                                 | Anode: TO-TiO <sub>2</sub><br>Cathode: graphite sheet                    | Three-electrode system<br>10 mA constant current         | 184 $\mu\text{mol/L/h/cm}^2$                                                             | 1.68 $\mu\text{mol/h/cm}^2$                                      | ~75%                                                | S4        |
|                                 | Anode: WO <sub>3</sub> /BiVO <sub>4</sub><br>Cathode: Pt                 | Three-electrode system<br>1 mA constant current          | ~42.4 $\mu\text{mol/L/h/cm}^2$<br>(0.5 M KHCO <sub>3</sub> solution)                     | ~1.48 $\mu\text{mol/h/cm}^2$                                     |                                                     | S3        |
|                                 | Anode: WO <sub>3</sub><br>Cathode: CF/DPA                                | Three-electrode system<br>-0.5 V cathodic bias potential | 108 $\mu\text{mol/L/h/cm}^2$                                                             |                                                                  |                                                     | S5        |
|                                 | Anode: DSA/IrO <sub>2</sub><br>Cathode: g-C <sub>3</sub> N <sub>4</sub>  | Three-electrode system<br>-0.7 V cathodic bias potential | 185.2 $\mu\text{mol/L/h/cm}^2$                                                           | 18.5 $\mu\text{mol/h/cm}^2$                                      |                                                     | S6        |
|                                 | Anode: WO <sub>3</sub><br>Cathode: mesoporous carbon                     | Three-electrode system<br>1 V anodic bias potential      | 132 $\mu\text{mol/L/h/cm}^2$                                                             | 19.8 $\mu\text{mol/h/cm}^2$                                      | 73%                                                 | S7        |
|                                 | Anode: $\alpha$ -Fe <sub>2</sub> O <sub>3</sub> nanorods<br>Cathode: GDE | Three-electrode system<br>0.5 V anodic bias potential    | 58.8 $\mu\text{mol/L/h/cm}^2$                                                            |                                                                  | 32.5%                                               | S8        |
|                                 | <b>Our work (light+1 V voltage)</b>                                      | Two-electrode system<br>1V cell voltage                  | 266 $\mu\text{mol/L/h/cm}^2$                                                             | 10.6 $\mu\text{mol/h/cm}^2$                                      | 73.6%                                               |           |

S1. Ye, F.; Wang, T.; Quan, X.; Yu, H.; Chen, S., Constructing Efficient WO<sub>3</sub>-FPC System for Photoelectrochemical H<sub>2</sub>O<sub>2</sub> Production and Organic Pollutants Degradation. *Chem. Eng. J.* **2020**, 389, 123427.

S2. Jeon, T. H.; Kim, H.; Kim, H.-i.; Choi, W., Highly Durable Photoelectrochemical H<sub>2</sub>O<sub>2</sub> Production via Dual Photoanode and Cathode Processes under Solar Simulating and External Bias-Free Conditions. *Energy Environ. Sci.* **2020**, 13 (6), 1730-1742.

S3. Fuku, K.; Sayama, K., Efficient Oxidative Hydrogen Peroxide Production and Accumulation in Photoelectrochemical Water Splitting Using a Tungsten Trioxide/Bismuth Vanadate Photoanode. *Chem. Commun.* **2016**, 52 (31), 5406.

S4. Leng, W. H.; Zhu, W. C.; Ni, J.; Zhang, Z.; Zhang, J. Q.; Cao, C. N., Photoelectrocatalytic Destruction of Organics Using TiO<sub>2</sub> as Photoanode with Simultaneous Production of H<sub>2</sub>O<sub>2</sub> at the Cathode. *Appl. Catal. A-Gen.* **2006**, 300 (1), 24-35.

S5. Xiao, K.; Liang, H.; Chen, S.; Yang, B.; Zhang, J.; Li, J., Enhanced Photoelectrocatalytic Degradation of Bisphenol A and Simultaneous Production of Hydrogen Peroxide in Saline Wastewater Treatment. *Chemosphere* **2019**, 222, 141-148.

S6. Yu, F.; Wang, Y.; Ma, H.; Dong, G., Enhancing the Yield of Hydrogen Peroxide and Phenol Degradation via a Synergistic Effect of Photoelectrocatalysis Using a g-C<sub>3</sub>N<sub>4</sub>/ACF Electrode. *Int. J. Hydrog. Energy.* **2018**, 43 (42), 19500-19509.

S7. Papagiannis, I.; Doukas, E.; Kalarakis, A.; Avgouropoulos, G.; Lianos, P., Photoelectrocatalytic H<sub>2</sub> and H<sub>2</sub>O<sub>2</sub> Production Using Visible-Light-Absorbing Photoanodes. *Catalysts* **2019**, 9 (3), 243.

S8. Mei, X.; Bai, J.; Chen, S.; Zhou, M.; Jiang, P.; Zhou, C.; Fang, F.; Zhang, Y.; Li, J.; Long, M.;

Zhou, B., Efficient SO<sub>2</sub> Removal and Highly Synergistic H<sub>2</sub>O<sub>2</sub> Production Based on a Novel Dual-Function Photoelectrocatalytic System. *Environ. Sci. Technol.* **2020**, *54* (18), 11515-11525.

### The detailed calculation of energy consumption

The calculation method<sup>S9</sup> of energy consumption is as follows:

$$P = \frac{U \times I \times t}{3600} = \frac{U \times Q}{3600}$$

In this equation, P is the total power (W), U is the potential difference between photoanode and cathode (V), I is the current (A), t is the reaction time (s), Q is the quantity of charge transferred (C).

In experimental operation, U is obtained by the open circuit voltage test, Q is acquired directly from electrochemical workstation. When testing the integrated system, the TiO<sub>2</sub> was used as photoanode coupled with the GDE as both cathode and reference electrode. Except for the potential difference between the TiO<sub>2</sub> and GDE obtained by the open circuit potential test, the cathodic and anodic potential were obtained by using an additional multimeter. Considering the anodic half reaction (Pt sheet as the counter electrode and SCE as reference electrode) for phenol degradation, a stable potential measured previously in the integrated system was applied to TiO<sub>2</sub> by electrochemical workstation. It is similar to dealing with the cathodic half reaction.

S9. Guo, C.; He, P.; Cui, R.; Shen, Q.; Yang, N.; Zhao, G., Electrochemical CO<sub>2</sub> Reduction Using Electrons Generated from Photoelectrocatalytic Phenol Oxidation. *Adv. Energy Mater.* **2019**, 9 (18), 1900364.
